# Supplementary material for: On the role of ethylene, auxin and a GOLVEN-like peptide hormone in the regulation of peach ripening
Source: PubMed Central journal article supplement (PMC4750175; doi:10.1186/s12870-016-0730-7), 2016-02-11
Supplement: 12870_2016_730_MOESM3_ESM.pdf [file 12870_2016_730_MOESM3_ESM.pdf]

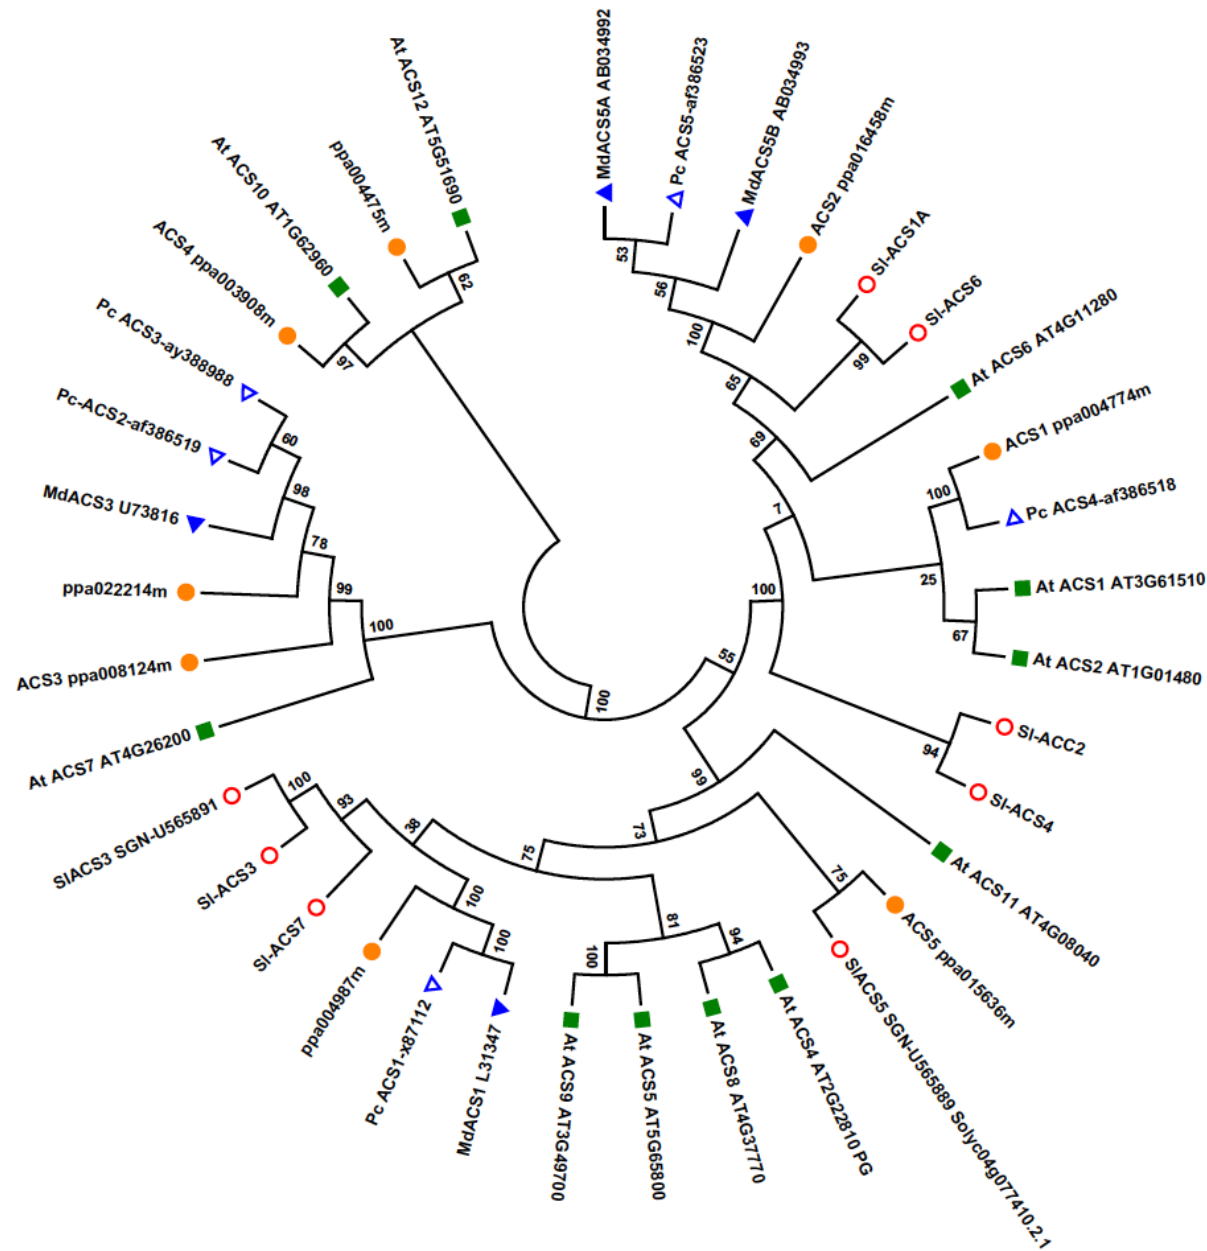

**Additional file 3: ACS phylogenetic tree**

**Additional file 3.** Phylogenetic analysis of ACS proteins.

Phylogenetic and molecular evolutionary analyses were conducted using MEGA version 5 [1]. The evolutionary history was inferred using the Neighbor-Joining method and 1000 bootstrap replicates (values at nodes) [2]. The optimal tree with the sum of branch length is shown. The tree is drawn to scale, with branch lengths in the same units as those of the evolutionary distances used to infer the phylogenetic tree. The evolutionary distances were computed using the Poisson correction method [3] and are in the units of the number of amino acid substitutions per site. The analysis involved 36 amino acid sequences. All positions containing gaps and missing data were eliminated. There were a total of 270 positions in the final dataset. Same symbol used for sequences belonging to the same species.

1. Tamura K., Peterson D., Peterson N., Stecher G., Nei M., and Kumar S. (2011). MEGA5: Molecular Evolutionary Genetics Analysis using Maximum Likelihood, Evolutionary Distance, and Maximum Parsimony Methods. *Molecular Biology and Evolution* 28: 2731-2739.
2. Saitou N. and Nei M. (1987). The neighbor-joining method: A new method for reconstructing phylogenetic trees. *Molecular Biology and Evolution* 4:406-425.
3. Zuckerkandl E. and Pauling L. (1965). Evolutionary divergence and convergence in proteins. Edited in *Evolving Genes and Proteins* by V. Bryson and H.J. Vogel, pp. 97-166. Academic Press, New York.
