# Supplementary material for: On the role of ethylene, auxin and a GOLVEN-like peptide hormone in the regulation of peach ripening
Source: PubMed Central journal article supplement (PMC4750175; doi:10.1186/s12870-016-0730-7), 2016-02-11
Supplement: 12870_2016_730_MOESM6_ESM.pdf [file 12870_2016_730_MOESM6_ESM.pdf]

| <b>Class</b> | <b>I<sub>AD</sub></b> | <b>FF (N)</b> | <b>SSC (°Brix)</b> | <b>Ethylene<br/>(nL•h<sup>-1</sup>•g<sup>-1</sup>FW)</b> |
|--------------|-----------------------|---------------|--------------------|----------------------------------------------------------|
| <b>1</b>     | 0.6-0.4               | 53 ± 2        | 11.2 ± 0.30        | n.d.                                                     |
| <b>2</b>     | 0.4-0.2               | 50 ± 2        | 11.1 ± 0.40        | n.d.                                                     |
| <b>3</b>     | 0.2-0                 | 51 ± 2        | 12.6 ± 0.1         | traces in some<br>fruits                                 |

## Supplementary Table 2

**Table S2.** Sampling and grading of 194RXXIII43 fruit in ripening classes according to I<sub>AD</sub>. FF: Flesh firmness, in Newtons. SSC: Soluble Solid Content, expressed as °Brix
